# Supplementary material
Source: publisher figshare collection journal article supplement (https://geolsoc.figshare.com/ndownloader/files/34180027)
Supplement: Supplementary file 1 [file 34180027]

#NEXUS
BEGIN TREES;

	UTREE 1 = (Amphimedon_queenslandica: 7.688790, (Trichoplax_adhaerens: 7.397850, (Acropora_digitifera: 7.097464, ((Ciona_intestinalis: 6.213197, (Danio_rerio: 4.341192, (Mus_musculus: 1.051663, Homo_sapiens: 1.051663) [&95%={0.68711, 1.53156}]: 3.289529) [&95%={4.2118, 4.52825}]: 1.872006) [&95%={6.08083, 6.32989}]: 0.400812, ((Brachionus_sp: 6.183958, ((Crassostrea_gigas: 5.372013, (Lottia_gigantea: 4.937027, Aplysia_californica: 4.937027) [&95%={4.77617, 5.09003}]: 0.434986) [&95%={5.32189, 5.46657}]: 0.564639, (Alvinella_pompejana: 5.393838, (Helobdella_robusta: 5.066508, Capitella_telata: 5.066508) [&95%={4.83015, 5.29582}]: 0.327330) [&95%={5.21612, 5.55717}]: 0.542814) [&95%={5.85578, 6.01715}]: 0.247305) [&95%={6.09808, 6.26448}]: 0.163916, ((Armorloricus_elegans: 6.094625, ((Meiopriapulus_sp: 5.523698, (Priapulus_caudatus: 1.776428, Halicryptus_spinulosus: 1.776428) [&95%={1.24198, 2.368}]: 3.747270) [&95%={5.34577, 5.67363}]: 0.411711, (Pycnophyes_kielensis: 4.910786, (Echinoderes_sp: 1.925809, Echinoderes_horni: 1.925809) [&95%={1.26459, 2.60749}]: 2.984977) [&95%={4.50156, 5.22705}]: 1.024623) [&95%={5.8391, 6.02451}]: 0.159215) [&95%={6.00928, 6.17427}]: 0.114838, (((Gordius_sp: 4.514612, Nectonema_munidae: 4.514612) [&95%={4.08003, 4.86278}]: 0.930490, ((Xiphinema_index: 3.764044, (Trichuris_muris: 2.217170, Trichinella_spiralis: 2.217170) [&95%={1.68858, 2.72952}]: 1.546874) [&95%={3.26448, 4.19206}]: 0.501802, ((Pristionchus_pacificus: 1.681352, Caenorhabditis_elegans: 1.681352) [&95%={1.34089, 2.14139}]: 0.781133, (Brugia_malayi: 1.779280, Ascaris_sum: 1.779280) [&95%={1.39427, 2.26575}]: 0.683205) [&95%={2.01835, 3.00116}]: 1.803360) [&95%={3.79051, 4.6368}]: 1.179257) [&95%={5.24205, 5.60358}]: 0.652416, (((Actinarctus_doryphorus: 3.328446, (Echiniscus_testudo: 0.468389, Echiniscus_bisetosus: 0.468389) [&95%={0.280535, 0.728799}]: 2.860057) [&95%={2.67897, 3.85496}]: 1.277693, (Milnesium_tardigradum: 3.278210, (Richtersius_coronifer: 2.229271, (Ramazzottius_varieornatus: 1.820904, Hypsibius_dujardini: 1.820904) [&95%={1.3628, 2.23911}]: 0.408367) [&95%={1.70655, 2.67647}]: 1.048940) [&95%={2.66767, 3.72041}]: 1.327929) [&95%={4.15346, 4.93724}]: 1.407893, ((Epiperipatus_sp: 3.186642, (Peripatus_sp: 1.118818, Euperipatoides_kanagrensis: 1.118818) [&95%={0.578253, 1.76708}]: 2.067824) [&95%={1.98545, 4.10966}]: 2.688377, (((Pycnogonum_sp: 4.357465, Anoplodactylus_eroticus: 4.357465) [&95%={4.2997, 4.49276}]: 1.123657, (Limulus_polyphemus: 5.028581, ((Siro_boyerae: 4.495031, Ixodes_scapularis: 4.495031) [&95%={4.36269, 4.61975}]: 0.287474, (Chaerilus_celebensis: 4.472221, (Acanthoscurria_gomesiana: 3.343479, Neoscona_arabesca: 3.343479) [&95%={3.07154, 3.66367}]: 1.128741) [&95%={4.36518, 4.59325}]: 0.310284) [&95%={4.70987, 4.86089}]: 0.246076) [&95%={5.00571, 5.08176}]: 0.452541) [&95%={5.42273, 5.5463}]: 0.162604, (((Scutigera_coleoptrata: 4.731627, (Strigamia_maritima: 3.891798, Lithobius_fortificatus: 3.891798) [&95%={3.82877, 4.04526}]: 0.839829) [&95%={4.59905, 4.8673}]: 0.515733, ((Prostemmiulus_sp: 3.778854, Polydesmus_angustus: 3.778854) [&95%={3.30157, 4.18445}]: 1.043780, (Polyxenus_lagurus: 4.575537, Glomeridesmus_sp: 4.575537) [&95%={4.36115, 4.79242}]: 0.247097) [&95%={4.6605, 4.97752}]: 0.424726) [&95%={5.16318, 5.33165}]: 0.304177, ((Meganyctiphanes_norvegica: 2.555338, (Petrolisthes_cinctipes: 1.915338, Litopenaeus_vannamaei: 1.915338) [&95%={1.32865, 2.59018}]: 0.640000) [&95%={1.85602, 3.29219}]: 2.633634, ((Xibalbanus_tumulensis: 4.863082, (Tigriopus_japonicus: 3.253280, Eurytemora_affinis: 3.253280) [&95%={2.66093, 3.64129}]: 1.609802) [&95%={4.77334, 4.96031}]: 0.186344, ((Artemia_francisca: 4.168209, (Daphnia_magna: 0.766506, Daphnia_pulex: 0.766506) [&95%={0.455126, 1.18948}]: 3.401703) [&95%={4.05573, 4.3444}]: 0.789478, (Folsomia_candida: 4.782884, (Meinertellus_cundinamarcensis: 4.506384, ((Ephemera_danica: 3.956025, Calopteryx_splendens: 3.956025) [&95%={3.84111, 4.06951}]: 0.240051, ((Tetrix_subulata: 3.625962, (Peruphasma_schultei: 3.361742, (Periplaneta_americana: 2.685101, Mantis_religiosa: 2.685101) [&95%={2.39205, 2.95413}]: 0.676641) [&95%={3.22574, 3.50944}]: 0.264221) [&95%={3.51798, 3.73896}]: 0.326976, (Cercopis_vulnerata: 3.826117, ((Gynaikothrips_ficorum: 3.293948, Nasonia_sp: 3.293948) [&95%={3.17975, 3.39634}]: 0.329368, ((Platycentropus_radiatus: 2.501344, Parides_euridedes: 2.501344) [&95%={2.26146, 2.69479}]: 0.853637, (Tribolium_castaneum: 3.082133, Eurelon_nostras: 3.082133) [&95%={3.06932, 3.11673}]: 0.272848) [&95%={3.30088, 3.41777}]: 0.268335) [&95%={3.54774, 3.70541}]: 0.202800) [&95%={3.74159, 3.91622}]: 0.126822) [&95%={3.86572, 4.04557}]: 0.243138) [&95%={4.10427, 4.29131}]: 0.310308) [&95%={4.42081, 4.59645}]: 0.276500) [&95%={4.70947, 4.86743}]: 0.174803) [&95%={4.89572, 5.03686}]: 0.091739) [&95%={4.99398, 5.12682}]: 0.139546) [&95%={5.14287, 5.26269}]: 0.362565) [&95%={5.4917, 5.61732}]: 0.092189) [&95%={5.58131, 5.7107}]: 0.231293) [&95%={5.80409, 5.94639}]: 0.139012) [&95%={5.938, 6.08748}]: 0.083486) [&95%={6.01857, 6.17201}]: 0.111944) [&95%={6.12708, 6.28625}]: 0.138412) [&95%={6.25878, 6.42786}]: 0.266136) [&95%={6.50349, 6.71714}]: 0.483454) [&95%={6.93489, 7.26489}]: 0.300386) [&95%={7.18359, 7.63356}]: 0.290940) [&95%={7.28131, 8.30093}];

END;
